# Supplementary material for: Tuneable C3 product selectivity of glycerol electrooxidation on cubic and dendritic Pt nanocatalysts
Source: Royal Society of Chemistry journal article supplement (doi:10.1039/d4nr01127a), 2024-01-01
Supplement: d4nr01127a1.pdf [file d4nr01127a1.pdf]

## Supplementary Information

# TUNEABLE C3 PRODUCT SELECTIVITY OF GLYCEROL ELECTROOXIDATION ON CUBIC AND DENDRITIC Pt NANOCATALYSTS

Irina Terekhina<sup>a</sup>, Mats Johnsson<sup>a\*</sup>

<sup>a</sup> Department of Materials and Environmental Chemistry, Arrhenius Laboratory, Stockholm University, Stockholm SE-106 91, Sweden

\* Corresponding author

E-mail address: [mats.johnsson@mmk.su.se](mailto:mats.johnsson@mmk.su.se)

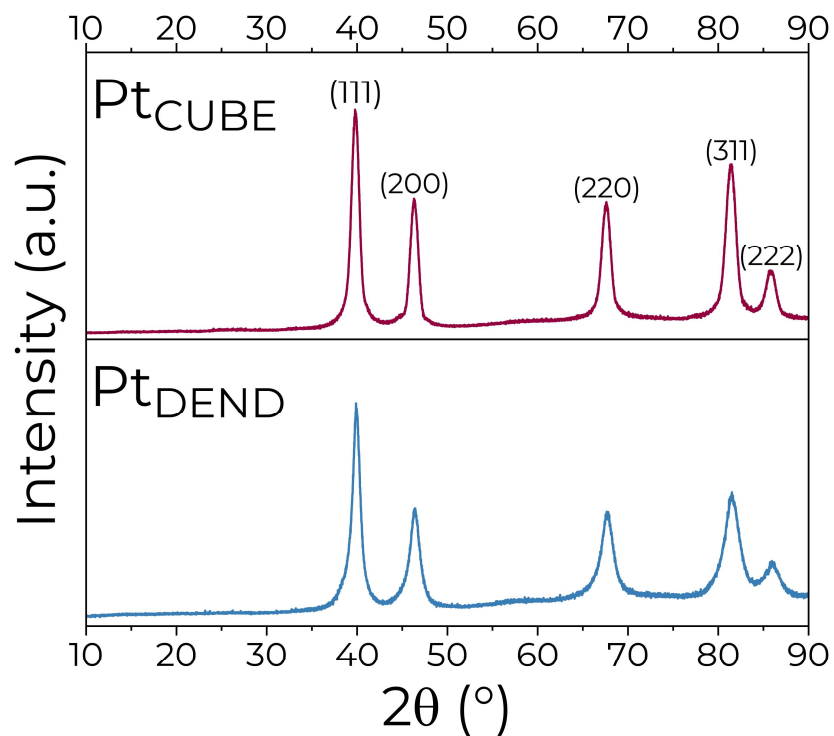

**Fig. S1.** PXRD diffractograms of Pt nanocatalysts.

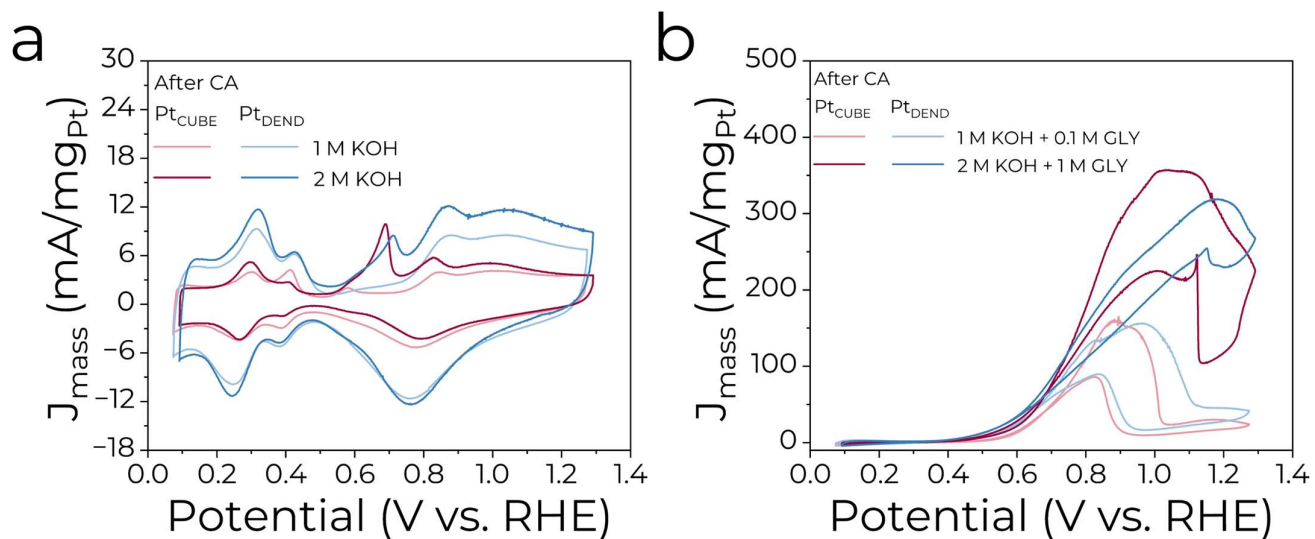

**Fig. S2.** CV profiles of Pt nanocatalysts in (a) 1 M KOH and 2 M KOH and (b) 1 M KOH + 0.1 M GLY and 2 M KOH + 1 M GLY solutions after potentiostatic measurements. The currents are normalised by the absolute Pt mass loading.

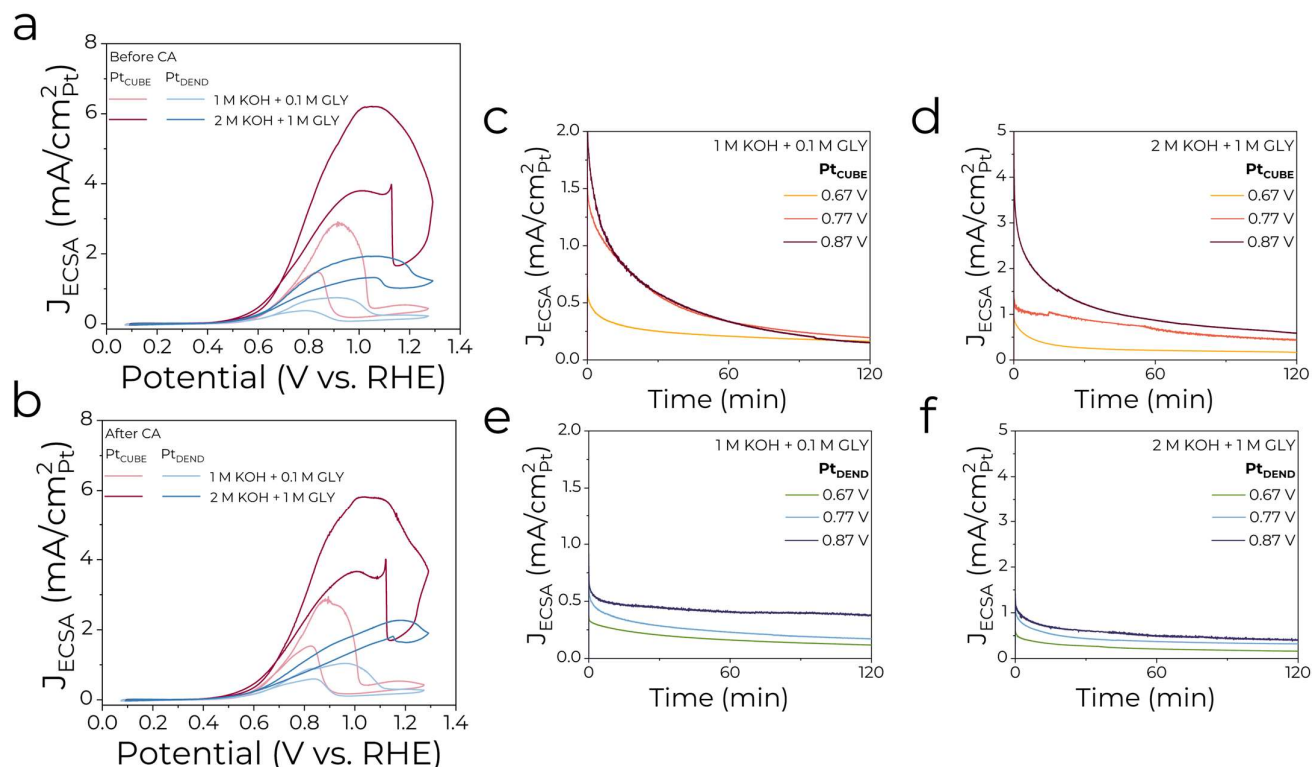

**Fig. S3.** CV profiles of Pt nanocatalysts in 1 M KOH + 0.1 M GLY and 2 M KOH + 1 M GLY solutions (a) before and (b) after the electrolysis. Potentiostatic electrolysis curves at 0.67, 0.77 and 0.87 V for (c–d) Pt<sub>CUBE</sub> and (e–f) Pt<sub>DEND</sub> in 1 M KOH + 0.1 M GLY and 2 M KOH + 1 M GLY solutions. The currents are normalised by the aECSA.

## Product Analysis

The glycerol conversion, product selectivity, carbon balance and total Faradaic efficiency were calculated using **Eqs S1–4**. The results are presented in **Tables S1–2**.

*Glycerol conversion:*

$$\eta_{\text{glycerol}} = \frac{C_{0,\text{glycerol}} - C_{\text{glycerol}}}{C_{0,\text{glycerol}}} \cdot 100\% \quad (\text{S1})$$

where  $C_{0,\text{glycerol}}$  and  $C_{\text{glycerol}}$  are the initial and final glycerol concentrations, mmol/l.

*Product selectivity:*

$$S_{\text{product}} = \frac{C_{\text{product}}}{\sum C_{\text{all products}}} \cdot 100\% \quad (\text{S2})$$

where  $C_{\text{product}}$  and  $C_{\text{all products}}$  are the individual product and total products' concentrations, mmol/l.

*Carbon balance:*

$$\text{CB} = \frac{C_{\text{glycerol}} + C_{\text{C}_3} + \frac{2}{3}C_{\text{C}_2} + \frac{1}{3}C_{\text{C}_1}}{C_{0,\text{glycerol}}} \cdot 100\% \quad (\text{S3})$$

where  $C_{\text{C}_3}$  is the concentration of the three-carbon products (dihydroxyacetone, glycerate, lactate, tartronate);  $C_{\text{C}_2}$  is the concentration of the two-carbon products (glycolate, oxalate, glyoxylate);  $C_{\text{C}_1}$  is the concentration of the one-carbon product (formate). All the concentrations are in mmol/l.

*Faradaic efficiency:*

Calculations of the total Faradaic efficiency (FE) of the GEOR are based on the following half-reactions:

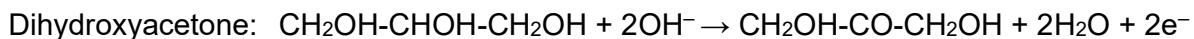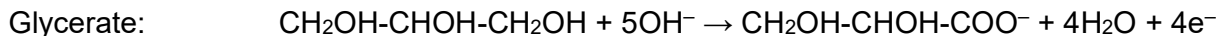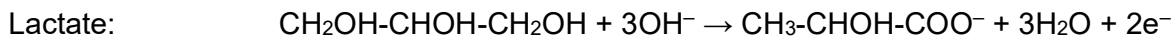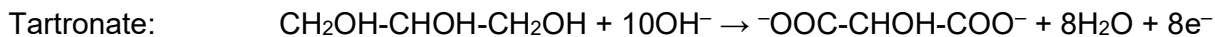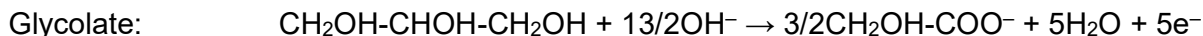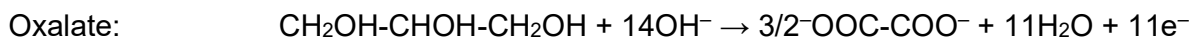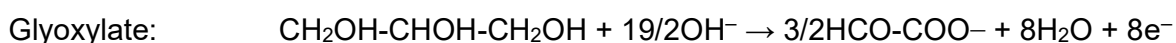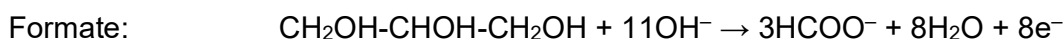

$$\text{FE} = \frac{\sum z \cdot C_{\text{product}}}{Q} \cdot V \cdot F \cdot 100\% \quad (\text{S4})$$

where  $z$  is the number of electrons transferred,  $V$  is the analyte volume, 0.015 L;  $F$  is the Faraday constant, 96485 C/mol, and  $Q$  is the total charge passed during electrolysis, C.

The carbon balance and Faradaic efficiency were not normalised by the electrolyte evaporation and concentration effects during the electrolysis.

High values above 100% could be due to (i) concentration effects as a result of the electrolyte evaporation, (ii) heterogeneous GEOR on Pt nanocatalysts in addition to the electrochemical oxidation, and (iii) uncertainties in HPLC analysis.

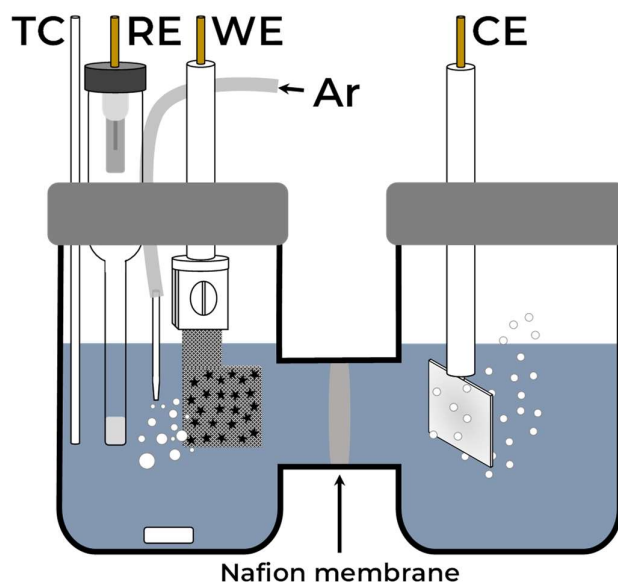

**Scheme S1.** Electrochemical divided cell. WE—working electrode, RE—reference electrode, CE—counter electrode, TC—thermocouple, Ar—argon gas.

**Table S1.** GEOR products concentrations, carbon balance and total Faradaic efficiency of GEOR for Pt NCs in a 1 M KOH + 0.1 M GLY electrolyte at different potentials.

| Catalyst           | Potential (V)  | Concentration (mM) |      |      |      |     |     |        |      | CB           | FE          |
|--------------------|----------------|--------------------|------|------|------|-----|-----|--------|------|--------------|-------------|
|                    |                | DHA                | GLE  | LACT | TART | GLO | OXA | GLYOXA | FORM | %            |             |
| Pt <sub>CUBE</sub> | 0.67           | 0.0                | 7.7  | 7.5  | 1.0  | 1.1 | 0.4 | 0.4    | 0.7  | 103.7        | 83.3        |
|                    | 0.77           | 0.0                | 12.7 | 9.4  | 2.1  | 2.6 | 1.9 | 0.7    | 1.7  | 102.6        | 77.4        |
|                    | 0.87           | 0.0                | 13.3 | 7.2  | 2.9  | 3.1 | 3.3 | 0.4    | 2.9  | 97.8         | 96.9        |
|                    | <b>Average</b> |                    |      |      |      |     |     |        |      | <b>101.4</b> | <b>85.9</b> |
| Pt <sub>DEND</sub> | 0.67           | 0.0                | 9.1  | 6.2  | 1.8  | 1.6 | 1.3 | 0.2    | 1.1  | 104.9        | 77.1        |
|                    | 0.77           | 0.0                | 7.2  | 4.0  | 3.1  | 2.5 | 4.0 | 0.0    | 2.1  | 98.7         | 67.6        |
|                    | 0.87           | 0.0                | 12.8 | 4.8  | 6.6  | 5.5 | 9.6 | 0.2    | 4.6  | 103.8        | 82.6        |
|                    | <b>Average</b> |                    |      |      |      |     |     |        |      | <b>102.5</b> | <b>75.7</b> |

**Table S2.** GEOR products concentrations, carbon balance and total Faradaic efficiency of GEOR for Pt NCs in a 2 M KOH + 1 M GLY electrolyte at different potentials.

| Catalyst           | Potential (V)  | Concentration (mM) |      |      |      |     |     |        |      | CB           | FE           |
|--------------------|----------------|--------------------|------|------|------|-----|-----|--------|------|--------------|--------------|
|                    |                | DHA                | GLE  | LACT | TART | GLO | OXA | GLYOXA | FORM | %            |              |
| Pt <sub>CUBE</sub> | 0.67           | 0.0                | 6.9  | 21.9 | 0.6  | 0.4 | 0.0 | 1.5    | 0.9  | 99.9         | 109.3        |
|                    | 0.77           | 0.0                | 25.6 | 36.9 | 2.7  | 4.1 | 0.4 | 5.7    | 2.1  | 103.9        | 109.5        |
|                    | 0.87           | 0.0                | 38.7 | 35.7 | 5.8  | 5.7 | 3.4 | 5.0    | 3.6  | 105.8        | 107.7        |
|                    | <b>Average</b> |                    |      |      |      |     |     |        |      | <b>103.2</b> | <b>108.8</b> |
| Pt <sub>DEND</sub> | 0.67           | 0.0                | 19.9 | 28.1 | 1.4  | 1.5 | 0.0 | 3.9    | 1.9  | 104.2        | 127.2        |
|                    | 0.77           | 0.0                | 31.1 | 29.9 | 4.1  | 4.2 | 4.0 | 3.6    | 3.3  | 105.1        | 114.0        |
|                    | 0.87           | 1.9                | 44.5 | 31.5 | 5.9  | 6.3 | 2.2 | 5.5    | 5.0  | 105.6        | 105.4        |
|                    | <b>Average</b> |                    |      |      |      |     |     |        |      | <b>104.9</b> | <b>115.5</b> |

**Table S3.** Comparison of recently reported Pt-based catalysts for the GEOR.

| Ref.         | Catalyst                                    | T               | v  | Electrolyte            | $E_f$                         | $J_{\text{mass}} / J_{\text{ECSA}}$                              | $E_{\text{electrolysis}}$                | t   | $S_{\text{d.prod.}}$                                                                                                          |
|--------------|---------------------------------------------|-----------------|----|------------------------|-------------------------------|------------------------------------------------------------------|------------------------------------------|-----|-------------------------------------------------------------------------------------------------------------------------------|
| Present work | Pt nanocubes                                | 20              | 50 | 1 KOH + 0.1 glycerol   | 0.92                          | 178 mA/mg <sub>Pt</sub><br>2.9 mA/cm <sup>2</sup> <sub>Pt</sub>  | 0.67 vs RHE<br>-0.4 vs SCE               | 120 | glycerate (41%)<br>lactate (40%)                                                                                              |
|              |                                             |                 |    |                        |                               |                                                                  | 0.77 vs RHE<br>-0.3 vs SCE               |     | glycerate (41%)<br>lactate (30%)                                                                                              |
|              |                                             |                 |    |                        |                               |                                                                  | 0.87 vs RHE<br>-0.2 vs SCE               |     | glycerate (40%)<br>lactate (22%)                                                                                              |
|              |                                             |                 |    | 2 KOH + 1 glycerol     | 1.05                          | 397 mA/mg <sub>Pt</sub><br>6.2 mA/cm <sup>2</sup> <sub>Pt</sub>  | 0.67 vs RHE<br>-0.418 vs SCE             |     | lactate (68%)<br>glycerate (21%)                                                                                              |
|              |                                             |                 |    |                        |                               |                                                                  | 0.77 vs RHE<br>-0.318 vs SCE             |     | lactate (48%)<br>glycerate (33%)                                                                                              |
|              |                                             |                 |    |                        |                               |                                                                  | 0.87 vs RHE<br>-0.218 vs SCE             |     | glycerate (40%)<br>lactate (36%)                                                                                              |
|              | Pt dendritic nanoparticles                  | 20              | 50 | 1 KOH + 0.1 glycerol   | 0.91                          | 93 mA/mg <sub>Pt</sub><br>0.7 mA/cm <sup>2</sup> <sub>Pt</sub>   | 0.67 vs RHE<br>-0.4 vs SCE               | 120 | glycerate (43%)<br>lactate (29%)                                                                                              |
|              |                                             |                 |    |                        |                               |                                                                  | 0.77 vs RHE<br>-0.3 vs SCE               |     | glycerate (32%)<br>lactate/oxalate (17%)                                                                                      |
|              |                                             |                 |    |                        |                               |                                                                  | 0.87 vs RHE<br>-0.2 vs SCE               |     | glycerate (29%)<br>oxalate (22%)                                                                                              |
|              |                                             |                 |    | 2 KOH + 1 glycerol     | 1.05                          | 237 mA/mg <sub>Pt</sub><br>1.9 mA/cm <sup>2</sup> <sub>Pt</sub>  | 0.67 vs RHE<br>-0.418 vs SCE             |     | lactate (49%)<br>glycerate (35%)                                                                                              |
|              |                                             |                 |    |                        |                               |                                                                  | 0.77 vs RHE<br>-0.318 vs SCE             |     | glycerate (39%)<br>lactate (37%)                                                                                              |
|              |                                             |                 |    |                        |                               |                                                                  | 0.87 vs RHE<br>-0.218 vs SCE             |     | glycerate (43%)<br>lactate (31%)                                                                                              |
| [18]         | Pt@Pd nanocubes                             | RT <sup>+</sup> | 50 | 0.5 KOH + 0.5 glycerol | ~(-0.13) vs SCE <sup>++</sup> | 3.2 mA/cm <sup>2</sup> <sub>Pd</sub>                             | -0.4 vs SCE<br>-0.1 vs SCE<br>0.2 vs SCE | 120 | glyceraldehyde (40%)<br>glycolate (30%)<br>glyceraldehyde (40%)<br>glycolate (35%)<br>glyceraldehyde (35%)<br>glycolate (40%) |
| [20]         | Pt catalyst with hierarchical pores         | 60              | 10 | 1 NaOH + 0.1 glycerol  | ~0.88                         | ~310 mA/mg <sub>Pt</sub><br>6.9 mA/cm <sup>2</sup> <sub>Pt</sub> | 0.69                                     | 60  | glycerate (59%)<br>formate (18%)                                                                                              |
|              | Pt catalyst with cubic pores                |                 |    |                        | ~0.86                         | ~620 mA/mg <sub>Pt</sub><br>3.3 mA/cm <sup>2</sup> <sub>Pt</sub> |                                          |     | glycerate (58%)<br>formate/oxalate (14%)                                                                                      |
|              | Pt catalyst with linear pores               |                 |    |                        | ~0.80                         | ~255 mA/mg <sub>Pt</sub><br>5.6 mA/cm <sup>2</sup> <sub>Pt</sub> |                                          |     | glycerate (60%)<br>formate (17%)                                                                                              |
| [22]         | Pt nanoflowers                              | RT <sup>+</sup> | 50 | 1 KOH + 1 glycerol     | ~(-0.15) vs SCE               | ~1250 mA/mg <sub>Pt</sub>                                        | -0.25 vs SCE                             | 60  | N/A                                                                                                                           |
|              | Pt <sub>3</sub> Ru <sub>1</sub> nanoflowers |                 |    |                        | ~(-0.18) vs SCE               | ~1750 mA/mg <sub>Pt</sub>                                        |                                          |     |                                                                                                                               |

|      |                                                |     |    |                        |                    |                                                                        |     |      |                                  |
|------|------------------------------------------------|-----|----|------------------------|--------------------|------------------------------------------------------------------------|-----|------|----------------------------------|
|      | Pt <sub>1</sub> Ru <sub>1</sub><br>nanoflowers |     |    |                        | ~(-0.17)<br>vs SCE | ~2000<br>mA/mg <sub>Pt</sub>                                           |     |      |                                  |
|      | Pt <sub>1</sub> Ru <sub>3</sub><br>nanoflowers |     |    |                        | ~(-0.16)<br>vs SCE | 2412<br>mA/mg <sub>Pt</sub>                                            |     |      |                                  |
|      | Pt <sub>1</sub> Ru <sub>5</sub><br>nanoflowers |     |    |                        | ~(-0.2)<br>vs SCE  | ~1100<br>mA/mg <sub>Pt</sub>                                           |     |      |                                  |
| [27] | Pt/C                                           | 60  | 50 | 0.1 KOH + 0.1 glycerol | 1.02**<br>(RT)     | 191<br>mA/mg <sub>Pt</sub><br>0.3<br>mA/cm <sup>2</sup> <sub>Pt</sub>  | 1.0 | N/A  | glycerate (59%)<br>lactate (17%) |
|      |                                                |     |    | 0.5 KOH + 0.1 glycerol |                    |                                                                        |     |      | glycerate (58%)<br>lactate (23%) |
|      |                                                |     |    | 1 KOH + 0.1 glycerol   |                    |                                                                        |     |      | glycerate (49%)<br>lactate (37%) |
|      | PtCu/C                                         |     |    | 0.1 KOH + 0.1 glycerol | 1.01**<br>(RT)     | 200<br>mA/mg <sub>Pt</sub><br>0.44<br>mA/cm <sup>2</sup> <sub>Pt</sub> |     | N/A  | glycerate (62%)<br>lactate (13%) |
|      |                                                |     |    | 0.5 KOH + 0.1 glycerol |                    |                                                                        |     |      | glycerate (40%)<br>lactate (23%) |
|      |                                                |     |    | 1 KOH + 0.1 glycerol   |                    |                                                                        |     |      | glycerate (45%)<br>lactate (19%) |
| [28] | Pt/C                                           | RT* | 50 | 1 KOH + 0.5 glycerol   | N/A                | N/A                                                                    | 720 | 0.45 | lactate (50%)<br>glycerate (41%) |
|      |                                                |     |    |                        |                    |                                                                        |     | 0.6  | lactate (31%)<br>glycerate (35%) |
|      |                                                |     |    |                        |                    |                                                                        |     | 0.9  | lactate (23%)<br>glycerate (50%) |
|      |                                                |     |    |                        |                    |                                                                        |     | 1.05 | lactate (19%)<br>glycerate (50%) |
|      | Pt <sub>90%surf</sub> Au/C                     |     |    |                        |                    |                                                                        |     | 0.45 | lactate (69%)<br>glycerate (24%) |
|      |                                                |     |    |                        |                    |                                                                        |     | 0.6  | lactate (54%)<br>glycerate (36%) |
|      |                                                |     |    |                        |                    |                                                                        |     | 0.9  | lactate (22%)<br>glycerate (53%) |
|      |                                                |     |    |                        |                    |                                                                        |     | 1.05 | lactate (27%)<br>glycerate (47%) |
|      | Pt <sub>64%surf</sub> Au/C                     |     |    |                        |                    |                                                                        |     | 0.45 | lactate (60%)<br>glycerate (25%) |
|      |                                                |     |    |                        |                    |                                                                        |     | 0.6  | lactate (43%)<br>glycerate (42%) |
|      |                                                |     |    |                        |                    |                                                                        |     | 0.9  | lactate (25%)<br>glycerate (49%) |
|      |                                                |     |    |                        |                    |                                                                        |     | 1.05 | lactate (31%)<br>glycerate (41%) |
|      | Pt <sub>29%surf</sub> Au/C                     |     |    |                        |                    |                                                                        |     | 0.45 | lactate (61%)<br>glycerate (22%) |
|      |                                                |     |    |                        |                    |                                                                        |     | 0.6  | lactate (55%)<br>glycerate (32%) |
|      |                                                |     |    |                        |                    |                                                                        |     | 0.9  | lactate (43%)<br>glycerate (37%) |
|      |                                                |     |    |                        |                    |                                                                        |     | 1.05 | lactate (29%)<br>glycerate (37%) |
|      | Pt <sub>15%surf</sub> Au/C                     |     |    |                        |                    |                                                                        |     | 0.45 | lactate (73%)<br>glycerate (18%) |
|      |                                                |     |    |                        |                    |                                                                        |     | 0.6  | lactate (61%)<br>glycerate (27%) |
|      |                                                |     |    |                        |                    |                                                                        |     | 0.9  | lactate (41%)<br>glycerate (42%) |

|      |            |     |    |                        |                   |                                         |                |                                                   |                                         |
|------|------------|-----|----|------------------------|-------------------|-----------------------------------------|----------------|---------------------------------------------------|-----------------------------------------|
|      |            |     |    |                        |                   |                                         | 1.05           |                                                   | glycolate (33%)<br>lactate (27%)        |
| [29] | Pt/GNS     | RT* | 50 | 0.5 KOH + 0.5 glycerol | -0.03 vs<br>SCE** | 0.3<br>mA/cm <sup>2</sup> <sub>Pt</sub> | -0.4 vs<br>SCE | 120                                               | glycolate (36%)<br>glyceraldehyde (32%) |
|      |            |     |    |                        |                   |                                         | -0.1 vs<br>SCE |                                                   | glycolate (55%)<br>glycerate (15%)      |
|      |            |     |    |                        |                   |                                         | 0.2 vs<br>SCE  |                                                   | glycolate (65%)<br>glycerate (13%)      |
|      | PtNi/GNS   |     |    |                        | -0.13 vs<br>SCE** | 0.4<br>mA/cm <sup>2</sup> <sub>Pt</sub> | -0.4 vs<br>SCE | glycolate (42%)<br>glycerate (36%)                |                                         |
|      |            |     |    |                        |                   |                                         | -0.1 vs<br>SCE | glycerate (48%)<br>glycolate (33%)                |                                         |
|      |            |     |    |                        |                   |                                         | 0.2 vs<br>SCE  | glyceraldehyde (30%)<br>glycerate (28%)           |                                         |
|      | PtRu/GNS   |     |    |                        | -0.1 vs<br>SCE**  | 0.4<br>mA/cm <sup>2</sup> <sub>Pt</sub> | -0.4 vs<br>SCE | glyceraldehyde (31%)<br>glycerate (31%)           |                                         |
|      |            |     |    |                        |                   |                                         | -0.1 vs<br>SCE | glycerate (40%)<br>glycolate (31%)                |                                         |
|      |            |     |    |                        |                   |                                         | 0.2 vs<br>SCE  | glycolate (48%)<br>glycerate (34%)                |                                         |
|      | PtRh/GNS   |     |    |                        | -0.16 vs<br>SCE** | 4.5<br>mA/cm <sup>2</sup> <sub>Pt</sub> | -0.4 vs<br>SCE | glycolate (41%)<br>oxalate (28%)                  |                                         |
|      |            |     |    |                        |                   |                                         | -0.1 vs<br>SCE | glycolate (40%)<br>glyceraldehyde/glycerate (19%) |                                         |
|      |            |     |    |                        |                   |                                         | 0.2 vs<br>SCE  | glycolate (52%)<br>glyceraldehyde/glycerate (14%) |                                         |
|      | PtRuNi/GNS |     |    |                        | -0.06 vs<br>SCE** | 0.4<br>mA/cm <sup>2</sup> <sub>Pt</sub> | -0.4 vs<br>SCE | glycolate (54%)<br>glycerate (26%)                |                                         |
|      |            |     |    |                        |                   |                                         | -0.1 vs<br>SCE | glyceraldehyde/glycerate (33%)                    |                                         |
|      |            |     |    |                        |                   |                                         | 0.2 vs<br>SCE  | glyceraldehyde (39%)<br>glycerate (15%)           |                                         |
|      | PtRhNi/GNS |     |    |                        | -0.15 vs<br>SCE** | 5.6<br>mA/cm <sup>2</sup> <sub>Pt</sub> | -0.4 vs<br>SCE | oxalate (38%)<br>glyceraldehyde (31%)             |                                         |
|      |            |     |    |                        |                   |                                         | -0.1 vs<br>SCE | glyceraldehyde (32%)<br>oxalate (26%)             |                                         |
|      |            |     |    |                        |                   |                                         | 0.2 vs<br>SCE  | glycolate (42%)<br>glyceraldehyde (19%)           |                                         |

\*room temperature, not specified in °C

\*\*in 0.1 M KOH + 1 M glycerol electrolyte

T—temperature, °C; v—scan rate, mV/s; Electrolyte—electrolyte composition for the potentiostatic measurements, mol/l; E<sub>f</sub>—forward peak potential, V vs RHE if not stated otherwise; J<sub>mass</sub>—forward peak mass activity, mA/mg<sub>catalyst</sub>; J<sub>ECSA</sub>—forward peak specific activity, mA/cm<sup>2</sup><sub>catalyst</sub>; E<sub>electrolysis</sub>—applied potential, V; t—electrolysis time, min; S<sub>d.prod.</sub>—selectivity of the two most dominant products, % (for some references, no exact numerical selectivity values were reported, so they were estimated from the reported GEOR products selectivity plots).

Catalyst supports: C—carbon; GNS—graphene nanosheets.

Reference electrodes: RHE—reversible hydrogen electrode; SCE—saturated calomel electrode (Hg/Hg<sub>2</sub>Cl<sub>2</sub>, sat. KCl).

All quantitative analyses of the GEOR products were performed using High-Pressure Liquid Chromatography (HPLC).



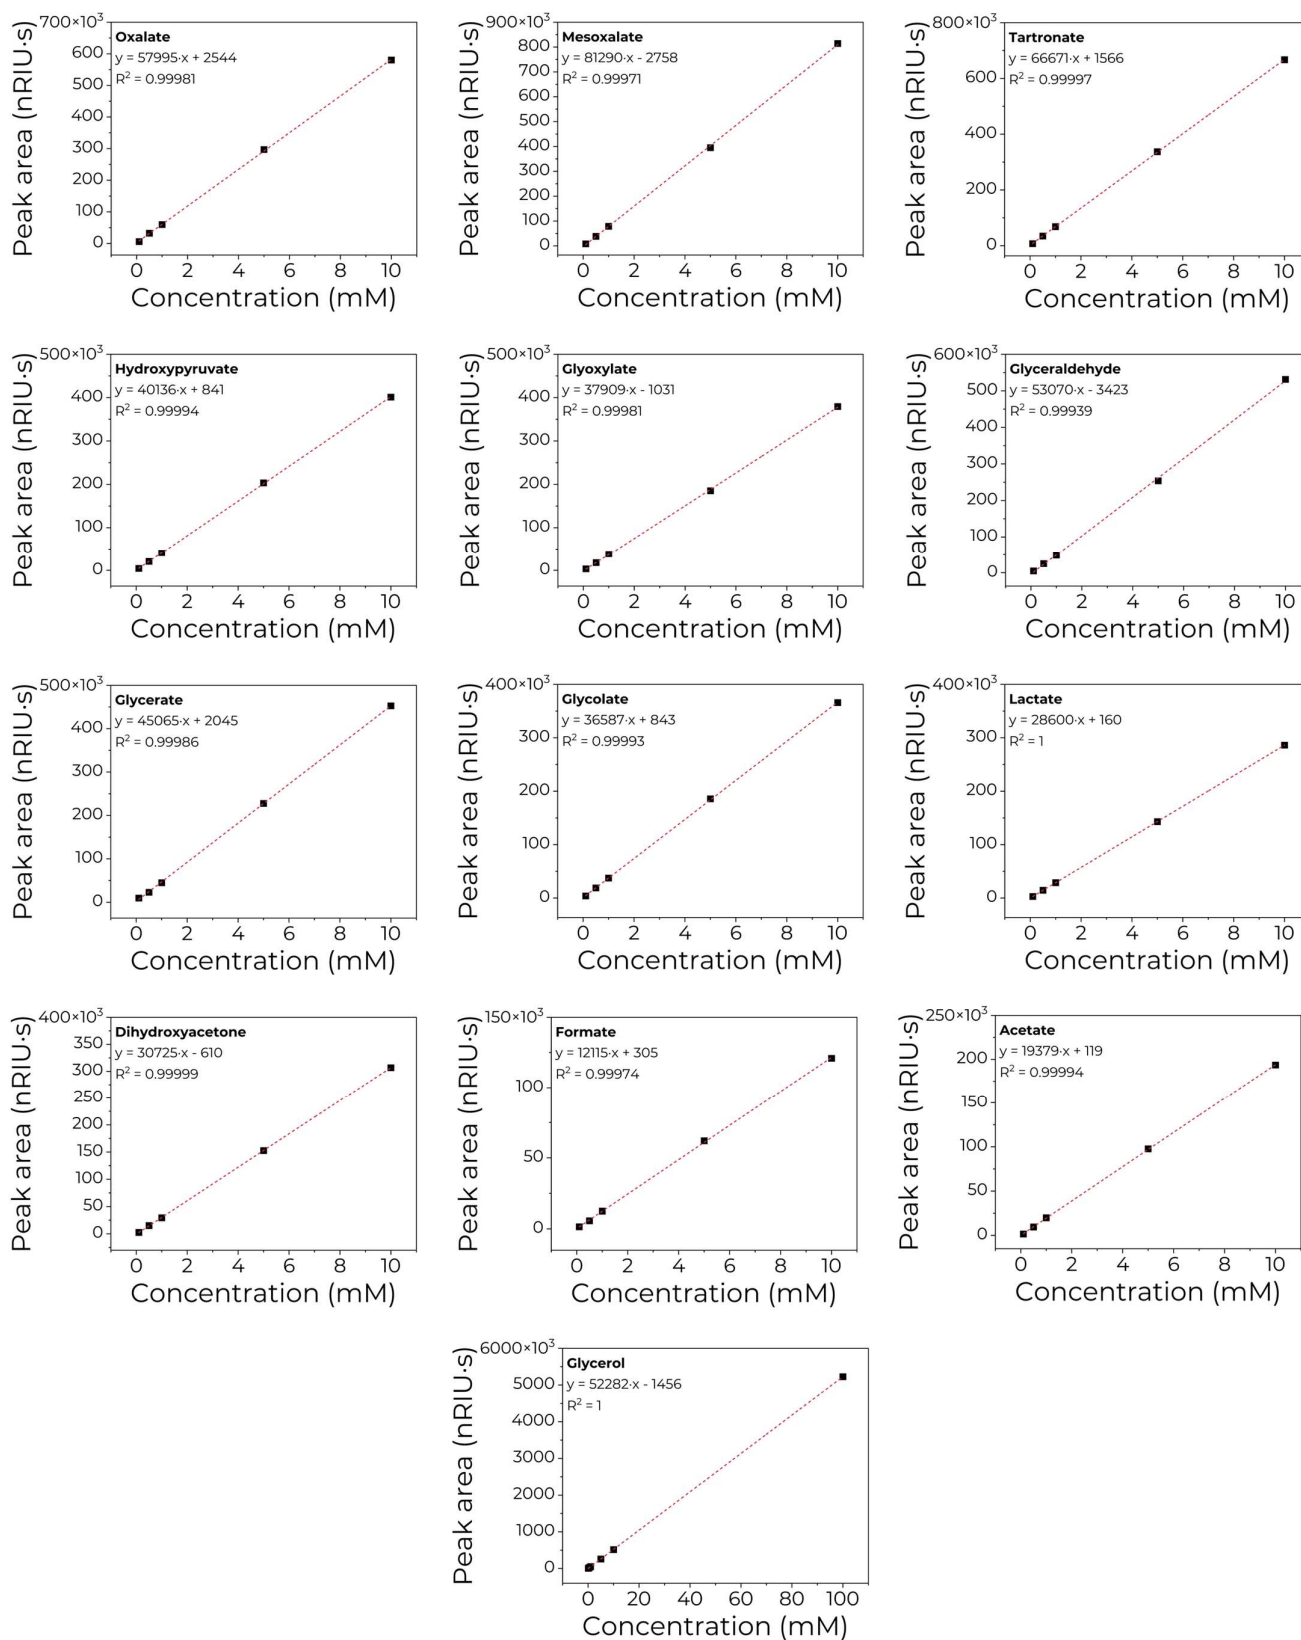

**Fig. S4.** Calibration curves of standard solutions of glycerol and possible GEOR products.

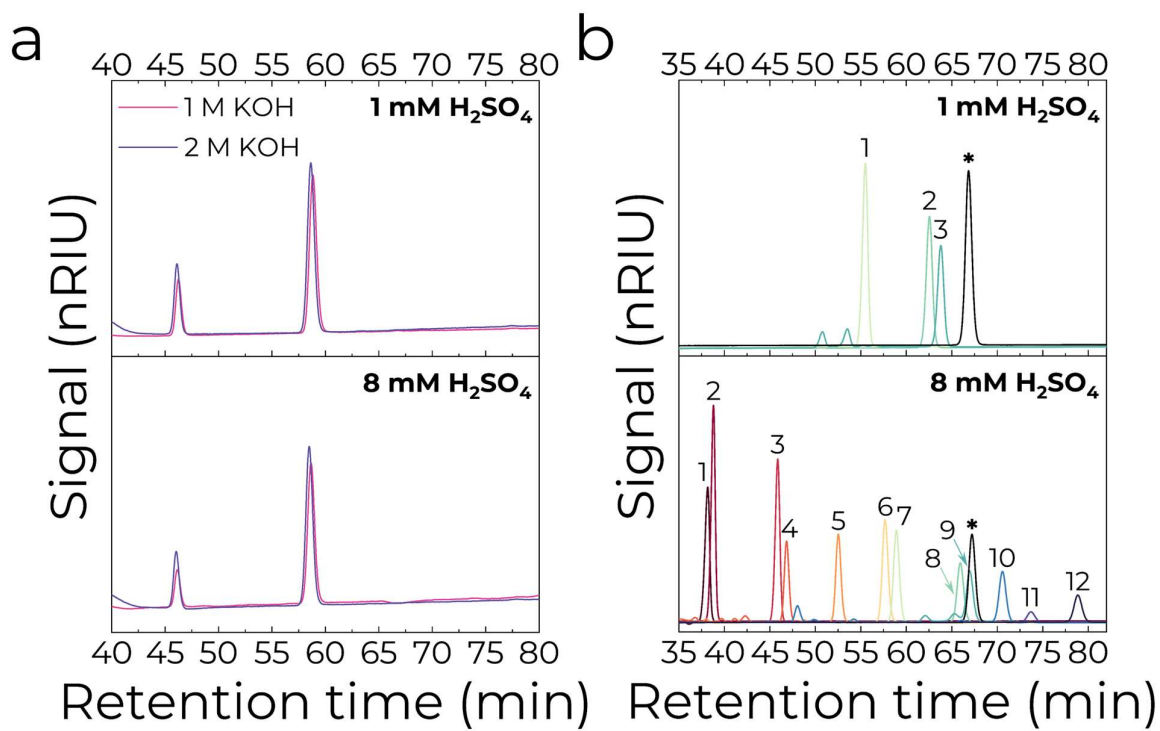

**Fig. S5.** HPLC chromatograms of a) 1 M and 2 M KOH solutions and b) 10 mM calibration solutions registered using 1 mM and 8 mM H<sub>2</sub>SO<sub>4</sub> mobile phases.

(b, 1 mM H<sub>2</sub>SO<sub>4</sub>): 1—glycerate, 2—glycolate, 3—lactate, star—glycerol.

(b, 8 mM H<sub>2</sub>SO<sub>4</sub>): 1—oxalate, 2—mesoxalate, 3—tartronate, 4—hydroxypyruvate, 5—glyoxylate, 6—glyceraldehyde, 7—glycerate, 8—glycolate, 9—lactate, star—glycerol, 10—dihydroxyacetone, 11—formate, 12—acetate.

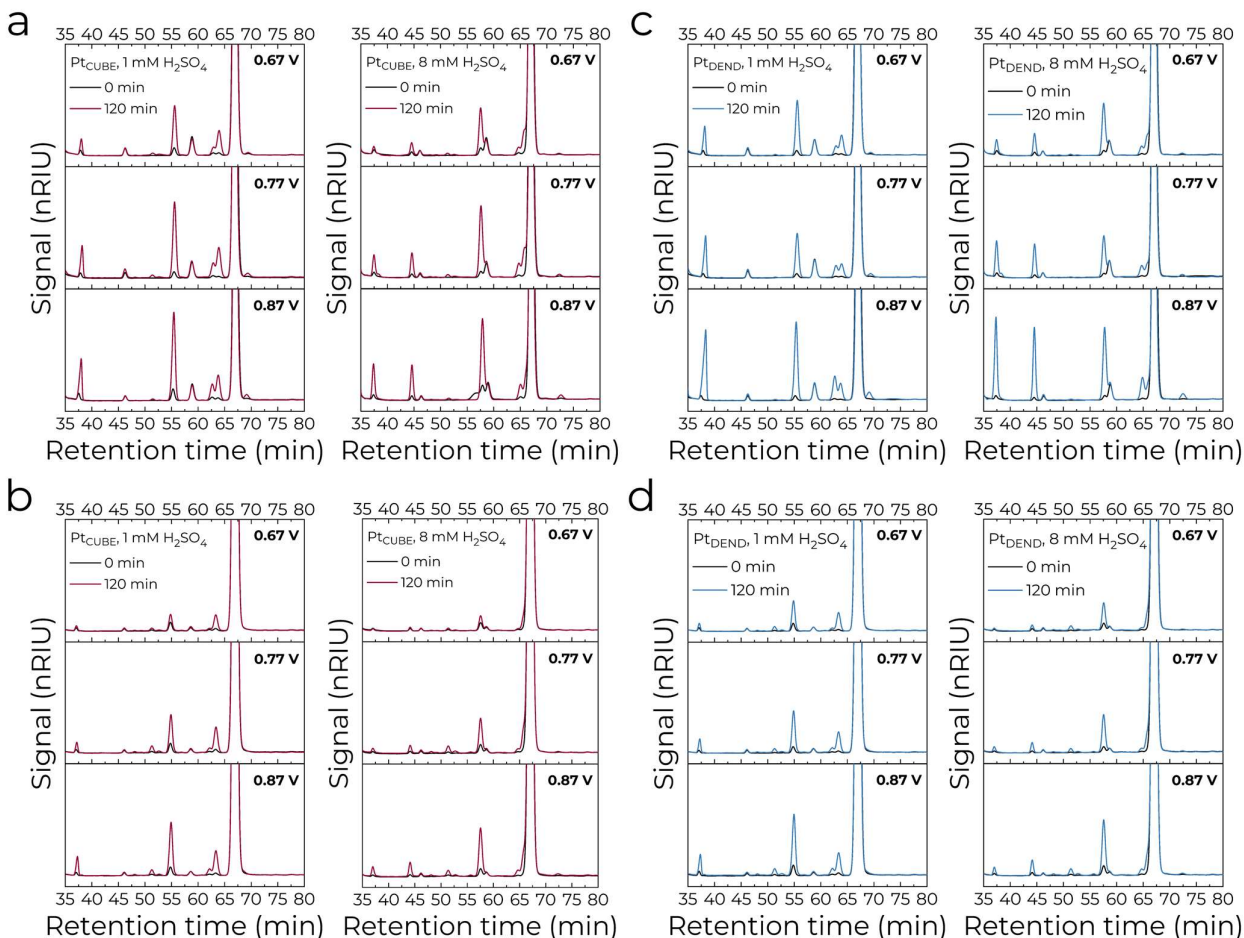

**Fig. S6.** HPLC chromatograms of samples collected from (a, c) 1 M KOH + 0.1 M GLY and (b, d) 2 M KOH + 1 M GLY electrolytes at different potentials for (a–b) Pt<sub>CUBE</sub> and (c–d) Pt<sub>DEND</sub> NPs using 1 mM H<sub>2</sub>SO<sub>4</sub> and 8 mM H<sub>2</sub>SO<sub>4</sub> as a mobile phase.

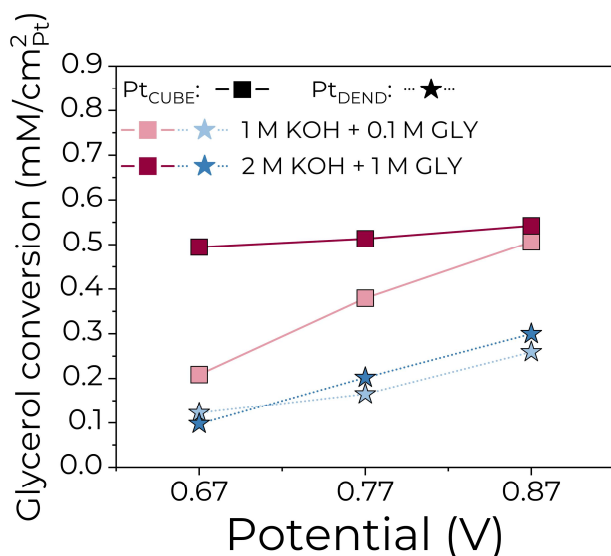

**Fig. S7.** Glycerol conversion for Pt<sub>CUBE</sub> and Pt<sub>DEND</sub> in 1 M KOH + 0.1 M GLY and 2 M KOH + 1 M GLY electrolytes. The converted glycerol concentration is normalised by the aECSA.

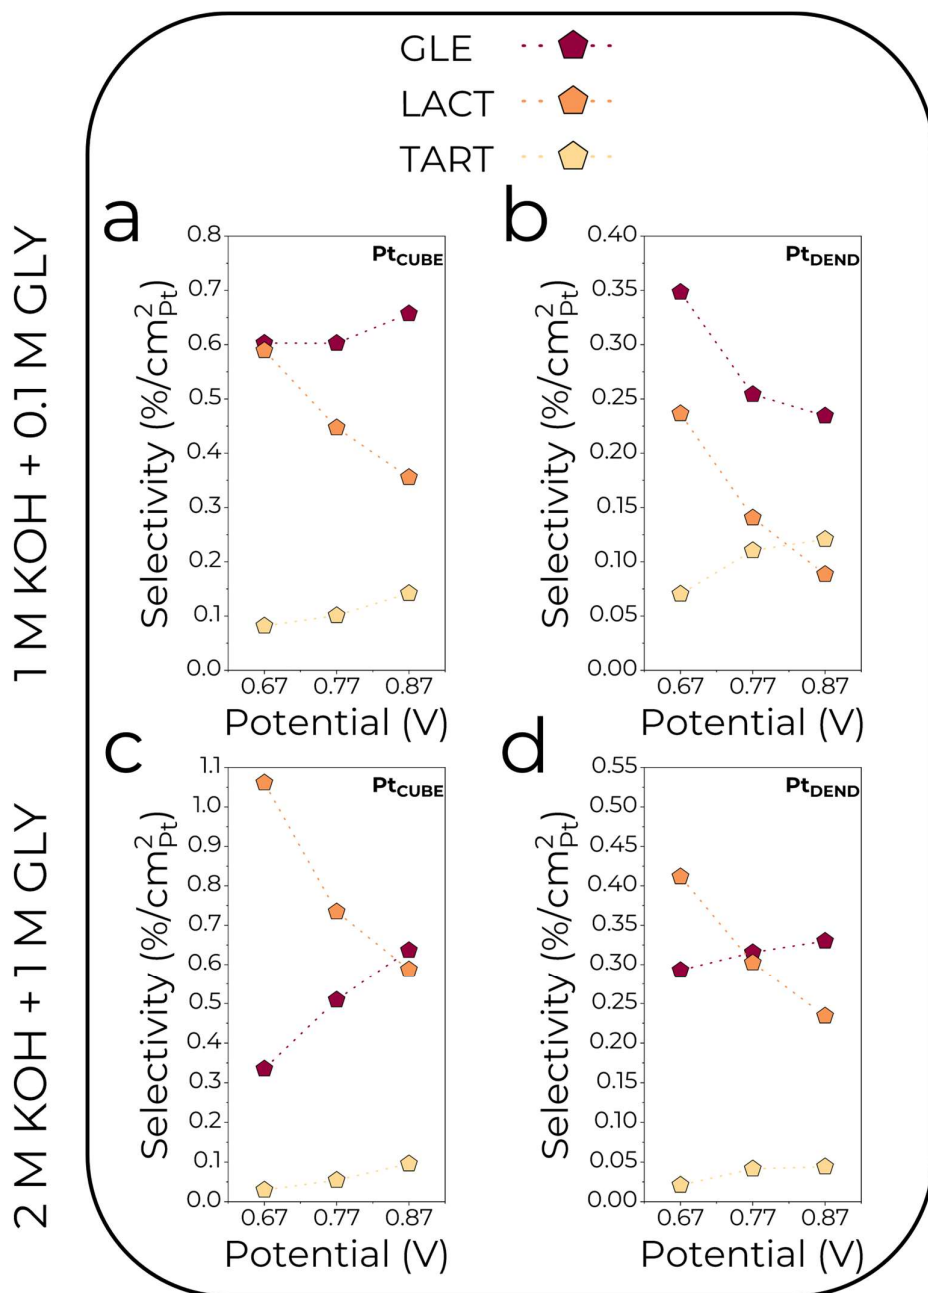

**Fig. S8.** Individual C3 products selectivity normalised by the aECSA as a function of the applied potential in (a–b) 1 M KOH + 0.1 M GLY and (c–d) 2 M KOH + 1 M GLY electrolytes. Note that all figures have different y-axis scales.
